# Supplementary material for: Aromatic L-Amino Acid Decarboxylase Deficiency: A Genetic Screening in Sicilian Patients with Neurological Disorders
Source: MDPI journal article supplement (doi:10.3390/genes15010134), 2024-01-21
Supplement: s1 [file s1]

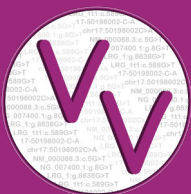

# VariantValidator

## Submitted Variant

NM\_000790.4:c.231C>A

- Selected genome build: GRCh37
- Map location: 7p12.2-p12.1
- CCDS ID: [CCDS5511.1](#)

## Versions

- [VariantValidator](#) 2.2.1.dev266+ga509813
- [vv\\_hgvs](#) 2.2.0
- [VVDdb](#) vvdvdb\_2023\_8
- [VVTA](#) vvta\_2023\_05
- [VVSeqRepo](#) VV\_SR\_2023\_05/master

## Recommended Variant Descriptions

1. HGVS guidelines recommend using genomic and transcript descriptions in all publications
2. Use of the three- or one-letter amino acid alphabet is optional, but three-letter is recommended

## Genomic descriptions

| Reference Sequence Type | Variant Description        |
|-------------------------|----------------------------|
| Chromosomal GRCh37      | NC_000007.13:g.50607697G>T |
| Chromosomal GRCh38      | NC_000007.14:g.50539999G>T |

## Transcript and protein descriptions

| Reference Sequence Type    | Variant Description      |
|----------------------------|--------------------------|
| Transcript                 | NM_000790.4:c.231C>A     |
| Protein three letter code  | NP_000781.2:p.(Phe77Leu) |
| Protein single letter code | NP_000781.2:p.(F77L)     |

## Gene Information

| Attribute | Identifier         | Source               |
|-----------|--------------------|----------------------|
| Symbol    | DDC                | <a href="#">HGNC</a> |
| Name      | dopa decarboxylase | <a href="#">HGNC</a> |
| HGNC ID   | HGNC:2719          | <a href="#">HGNC</a> |

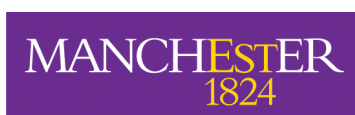

The University of Manchester

Copyright © 2016-2023  
VariantValidator  
Contributors

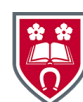

UNIVERSITY OF  
**LEICESTER**

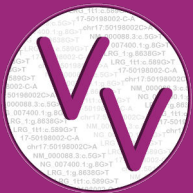

# VariantValidator

## Submitted Variant

NM\_000790.4:c.629C>T

- Selected genome build: GRCh37
- Map location: 7p12.2-p12.1
- CCDS ID: [CCDS5511.1](#)

## Versions

- [VariantValidator](#) 2.2.1.dev266+ga509813
- [vv\\_hgvs](#) 2.2.0
- [VVDdb](#) vvdvdb\_2023\_8
- [VVTA](#) vvta\_2023\_05
- [VVSeqRepo](#) VV\_SR\_2023\_05/master

## Recommended Variant Descriptions

1. HGVS guidelines recommend using genomic and transcript descriptions in all publications
2. Use of the three- or one-letter amino acid alphabet is optional, but three-letter is recommended

## Genomic descriptions

| Reference Sequence Type | Variant Description        |
|-------------------------|----------------------------|
| Chromosomal GRCh37      | NC_000007.13:g.50595920G>A |
| Chromosomal GRCh38      | NC_000007.14:g.50528222G>A |

## Transcript and protein descriptions

| Reference Sequence Type    | Variant Description       |
|----------------------------|---------------------------|
| Transcript                 | NM_000790.4:c.629C>T      |
| Protein three letter code  | NP_000781.2:p.(Pro210Leu) |
| Protein single letter code | NP_000781.2:p.(P210L)     |

## Gene Information

| Attribute | Identifier         | Source               |
|-----------|--------------------|----------------------|
| Symbol    | DDC                | <a href="#">HGNC</a> |
| Name      | dopa decarboxylase | <a href="#">HGNC</a> |
| HGNC ID   | HGNC:2719          | <a href="#">HGNC</a> |



The University of Manchester

Copyright © 2016-2023  
VariantValidator  
Contributors



UNIVERSITY OF  
**LEICESTER**



# VariantValidator

## Submitted Variant

NM\_000790.4:c.714+3A>G

- Selected genome build: GRCh37
- Map location: 7p12.2-p12.1
- CCDS ID: [CCDS5511.1](#)

## Versions

- [VariantValidator](#) 2.2.1.dev266+ga509813
- [vv\\_hgvs](#) 2.2.0
- [VVDdb](#) vvdvdb\_2023\_8
- [VVTA](#) vvta\_2023\_05
- [VVSeqRepo](#) VV\_SR\_2023\_05/master

## Recommended Variant Descriptions

1. HGVS guidelines recommend using genomic and transcript descriptions in all publications
2. Use of the three- or one-letter amino acid alphabet is optional, but three-letter is recommended

## Genomic descriptions

| Reference Sequence Type | Variant Description        |
|-------------------------|----------------------------|
| Chromosomal GRCh37      | NC_000007.13:g.50595832T>C |
| Chromosomal GRCh38      | NC_000007.14:g.50528134T>C |

## Transcript and protein descriptions

| Reference Sequence Type    | Variant Description                  |
|----------------------------|--------------------------------------|
| Transcript                 | NC_000007.13(NM_000790.4):c.714+3A>G |
| Protein three letter code  | NP_000781.2:p.?                      |
| Protein single letter code | NP_000781.2:p.?                      |

## Gene Information

| Attribute | Identifier         | Source               |
|-----------|--------------------|----------------------|
| Symbol    | DDC                | <a href="#">HGNC</a> |
| Name      | dopa decarboxylase | <a href="#">HGNC</a> |
| HGNC ID   | HGNC:2719          | <a href="#">HGNC</a> |



The University of Manchester

Copyright © 2016-2023  
VariantValidator  
Contributors



UNIVERSITY OF  
**LEICESTER**



# VariantValidator

## Submitted Variant

NM\_000790.4:c.772G>A

- Selected genome build: GRCh37
- Map location: 7p12.2-p12.1
- CCDS ID: [CCDS5511.1](#)

## Versions

- [VariantValidator](#) 2.2.1.dev266+ga509813
- [vv\\_hgvs](#) 2.2.0
- [VVDdb](#) vvdvdb\_2023\_8
- [VVTA](#) vvta\_2023\_05
- [VVSeqRepo](#) VV\_SR\_2023\_05/master

## Recommended Variant Descriptions

1. HGVS guidelines recommend using genomic and transcript descriptions in all publications
2. Use of the three- or one-letter amino acid alphabet is optional, but three-letter is recommended

## Genomic descriptions

| Reference Sequence Type | Variant Description        |
|-------------------------|----------------------------|
| Chromosomal GRCh37      | NC_000007.13:g.50571700C>T |
| Chromosomal GRCh38      | NC_000007.14:g.50504002C>T |

## Transcript and protein descriptions

| Reference Sequence Type    | Variant Description       |
|----------------------------|---------------------------|
| Transcript                 | NM_000790.4:c.772G>A      |
| Protein three letter code  | NP_000781.2:p.(Gly258Ser) |
| Protein single letter code | NP_000781.2:p.(G258S)     |

## Gene Information

| Attribute | Identifier         | Source               |
|-----------|--------------------|----------------------|
| Symbol    | DDC                | <a href="#">HGNC</a> |
| Name      | dopa decarboxylase | <a href="#">HGNC</a> |
| HGNC ID   | HGNC:2719          | <a href="#">HGNC</a> |



The University of Manchester

Copyright © 2016-2023  
VariantValidator  
Contributors



UNIVERSITY OF  
**LEICESTER**



# VariantValidator

## Submitted Variant

NM\_000790.4:c.1385G>A

- Selected genome build: GRCh37
- Map location: 7p12.2-p12.1
- CCDS ID: [CCDS5511.1](#)

## Versions

- [VariantValidator](#) 2.2.1.dev266+ga509813
- [vv\\_hgvs](#) 2.2.0
- [VVDdb](#) vvdvdb\_2023\_8
- [VVTA](#) vvta\_2023\_05
- [VVSeqRepo](#) VV\_SR\_2023\_05/master

## Recommended Variant Descriptions

1. HGVS guidelines recommend using genomic and transcript descriptions in all publications
2. Use of the three- or one-letter amino acid alphabet is optional, but three-letter is recommended

## Genomic descriptions

| Reference Sequence Type | Variant Description        |
|-------------------------|----------------------------|
| Chromosomal GRCh37      | NC_000007.13:g.50530987C>T |
| Chromosomal GRCh38      | NC_000007.14:g.50463289C>T |

## Transcript and protein descriptions

| Reference Sequence Type    | Variant Description       |
|----------------------------|---------------------------|
| Transcript                 | NM_000790.4:c.1385G>A     |
| Protein three letter code  | NP_000781.2:p.(Arg462Gln) |
| Protein single letter code | NP_000781.2:p.(R462Q)     |

## Gene Information

| Attribute | Identifier         | Source               |
|-----------|--------------------|----------------------|
| Symbol    | DDC                | <a href="#">HGNC</a> |
| Name      | dopa decarboxylase | <a href="#">HGNC</a> |
| HGNC ID   | HGNC:2719          | <a href="#">HGNC</a> |



The University of Manchester

Copyright © 2016-2023  
VariantValidator  
Contributors



UNIVERSITY OF  
LEICESTER
